# Supplementary material for: Quantitative Monitoring of Mycelial Growth of Aspergillus fumigatus in Liquid Culture by Optical Density
Source: Microbiol Spectr. 2022 Jan 5;10(1):e00063-21. doi: 10.1128/spectrum.00063-21 (PMC8729762; doi:10.1128/spectrum.00063-21)
Supplement: SUPPLEMENTAL FILE 1 — Supplemental material. Download SPECTRUM00063-21_Supp_1_seq7.pdf, PDF file, 1.2 MB [file spectrum00063-21_supp_1_seq7.pdf]

***Supplemental Material***

**Quantitative monitoring of mycelial growth of *Aspergillus  
fumigatus* in liquid culture by optical density**

**Ken Miyazawa, Takashi Umeyama, Yasutaka Hoshino, Keietsu Abe, and  
Yoshitsugu Miyazaki\***

\*Correspondence: Y. Miyazaki, [ym46@niid.go.jp](mailto:ym46@niid.go.jp)

**Table S1. Primers used in this study.**

| Primer name        | Sequence (5' to 3')                                            |
|--------------------|----------------------------------------------------------------|
| Afags1-LU          | AGAGTCGAGGAAATCACCGTTG                                         |
| Afags1-LL+hph      | GGCCATCTAGGCCAGAATATAGGGAAATTGCACAACCGAC                       |
| Afags1-RU+hph      | GGCCTGAGTGGCCTCCGAAGCTAGCTACGTGAACCTG                          |
| Afags1-RL          | CAGGATCGAGGTAATCAGGTATGTG                                      |
| 397-5              | GAGGCCACTCAGGCCGATATCACC                                       |
| 397-3              | CTGGCCTAGATGGCCGTCGACAAC                                       |
| IF1-lox66-hph-Fw   | TACCGTTCGTATAATGTATGCTATACGAAGTTATCTGGCCTA<br>GATGGCCGTCGACAAC |
| IF2-PxynG2-Fw      | GGCCTGAGTGGCCTCCCTCGTACTCGATGACGGCTTC                          |
| IF2-lox71-TagdA-Rv | TACCGTTCGTATAGCATACATTATACGAAGTTATGTTTCGAG<br>GGGTACCTGGTG     |
| IF3-lox71-pUC19    | GCTATACGAACGGTATCTAGAGTCGACCTGCAGGCATG                         |
| IF3-lox66-pUC19    | ATTATACGAACGGTACCGGGTACCGAGCTCGAATTC                           |
| M13-47             | CGCCAGGGTTTTCCCAGTCACGAC                                       |
| RV-M               | GAGCGGATAACAATTTACACAGG                                        |
| Afags1-LL-M13      | GTCGTGACTGGGAAAACCTGGCGAATATAGGGAAATTGC<br>ACAACCGAC           |
| Afags1-RU-M13      | CCTGTGTGAAATTGTTATCCGCTCCGAAGCTAGCTACGTGA<br>ACCTG             |
| Afgtb3-LU          | GGCATGGCATCGTACTTCGTG                                          |
| Afgtb3-LL+hph      | GGCCATCTAGGCCAGGACGTCCAAAGATCCGTACTGTG                         |

Afgtb3-RU+hph

GGCCTGAGTGGCCTCCATCGCGCTGATGATCTCTCTG

Afgtb3-RL

CAAGGCAAGACTCCAGACCTG

---

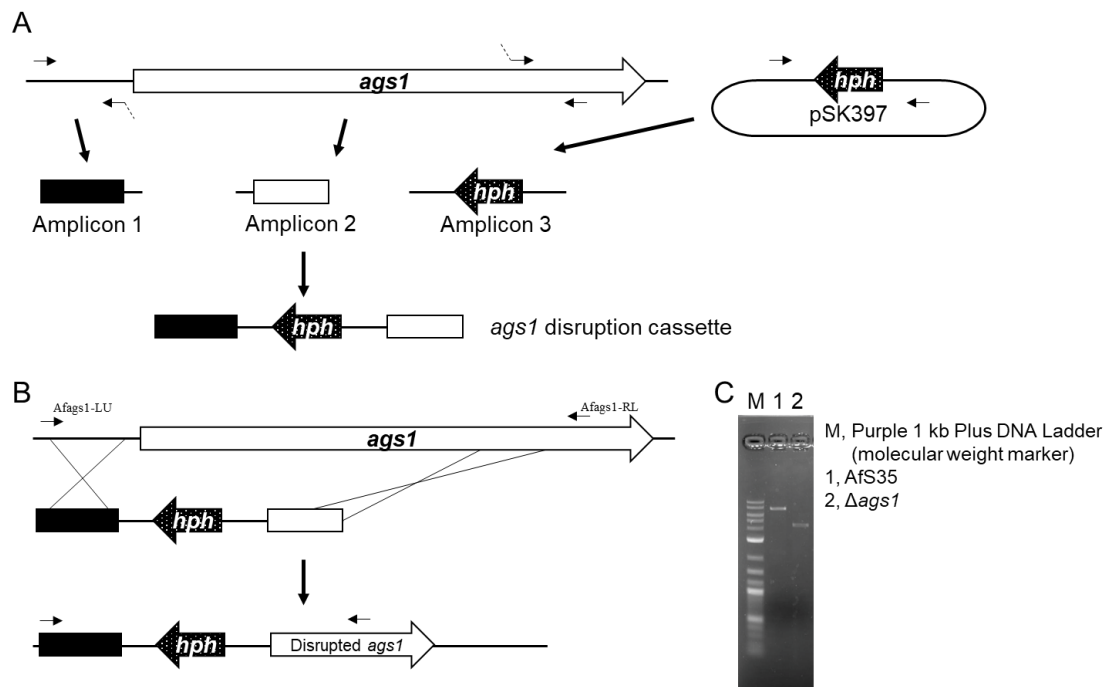

**Figure S1. Construction of the  $\Delta$ ags1 strain.** (A) Scheme of construction of the *ags1* disruption cassette. (B) Strategy for replacement of the disrupted *ags1* gene with the hygromycin resistance marker *hph*. (C) PCR analysis of *ags1* gene disruption with the primers indicated in (B).

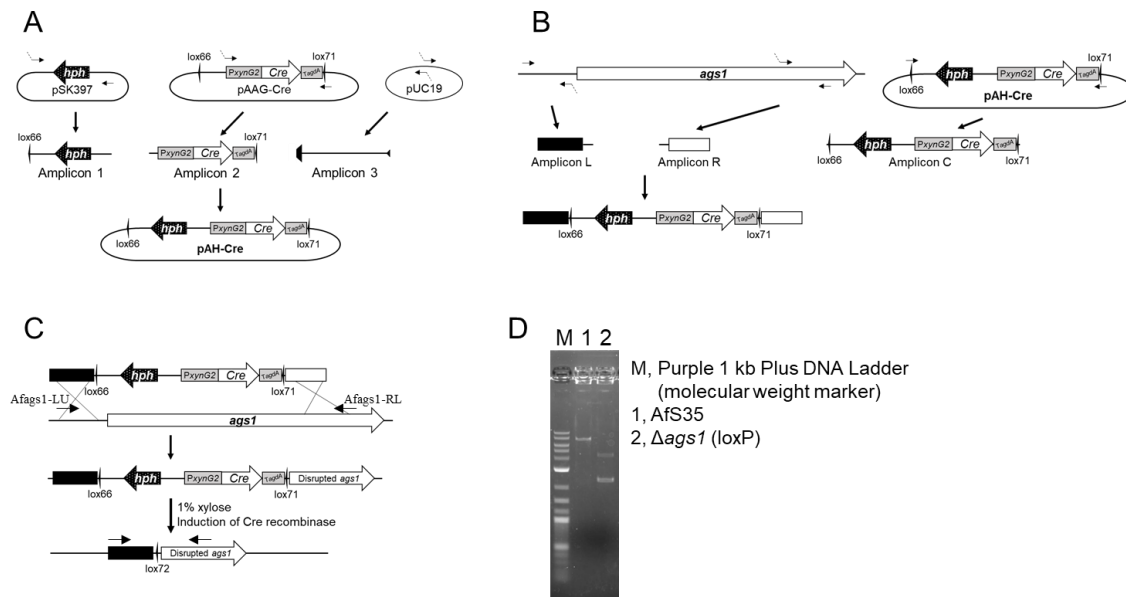

**Figure S2. Construction of the  $\Delta$ *ags1* (loxP) strain by using the Cre/mutant *loxP* marker recycling system.** (A) Construction of the pAH-Cre plasmid. Fragments containing *hph*, *PxynG2* and *Cre*, and *ampR* and *ori* were amplified and fused using a NEBuilder HiFi DNA Assembly kit. (B) Construction of the *ags1* gene disruption cassette containing the Cre/mutant *loxP* marker recycling system. (C) Strategy for gene replacement to disrupt *ags1*. The PCR-amplified cassette was used to transform the AfS35 strain. Candidate strains were isolated on the basis of hygromycin resistance. Then the *Cre* gene was induced by culture on AMM medium containing 1% xylose, resulting in marker cassette excision. (D) PCR analysis of *ags1* gene disruption using the primers indicated in (C).

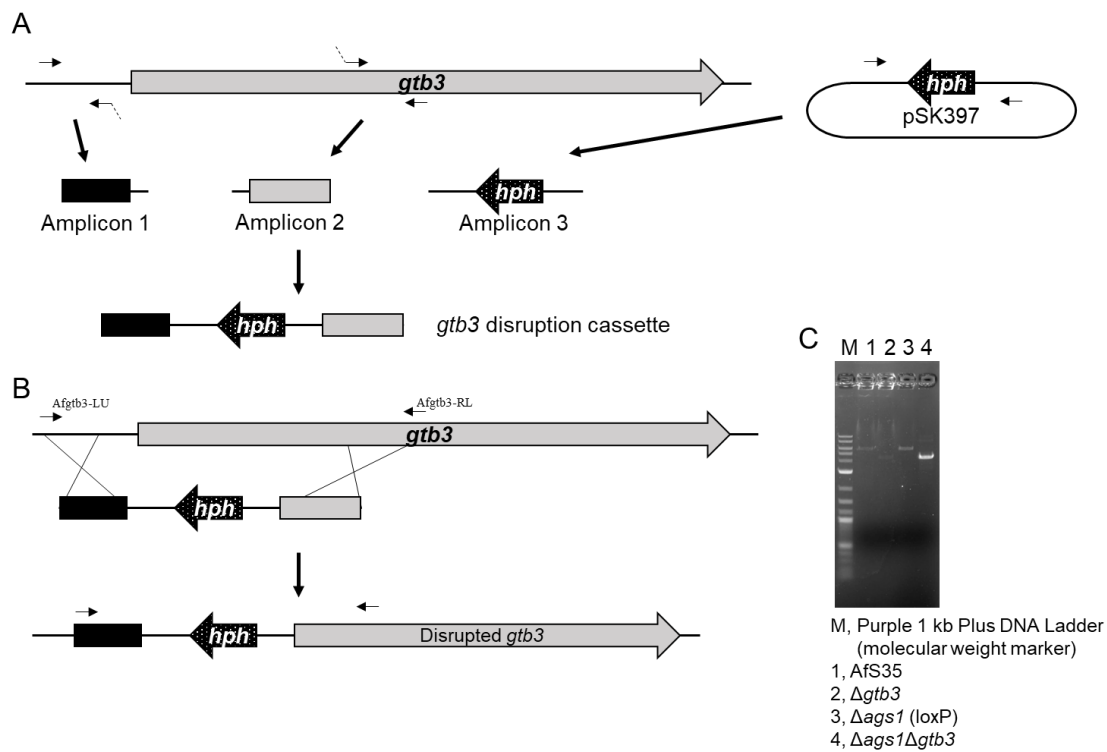

**Figure S3. Disruption of the *gtb3* gene to generate single ( $\Delta gtb3$ ) and double ( $\Delta ags1\Delta gtb3$ ) mutants. (A) Scheme of construction of the *gtb3* disruption cassette. (B) Strategy for replacement of the disrupted *gtb3* gene with the hygromycin resistance marker *hph*. (C) PCR analysis of *gtb3* gene disruption with the primers indicated in (B).**

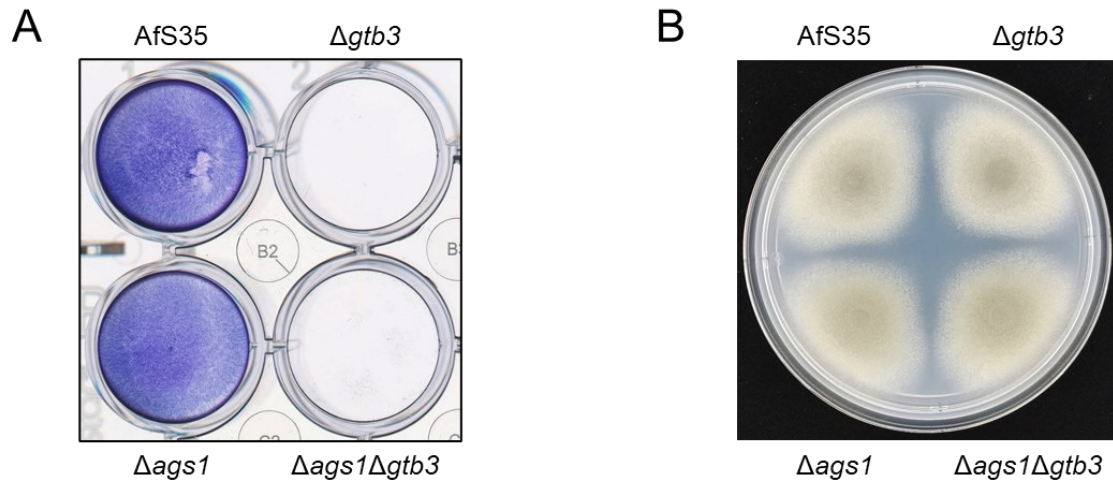

**Figure S4. Biofilm formation and radial growth of the AfS35,  $\Delta ags1$ ,  $\Delta gtb3$ , and  $\Delta ags1\Delta gtb3$  strains.** (A) Biofilm formation on polystyrene plates. Conidia ( $1 \times 10^4$ ) of each strain were inoculated into AMM medium in a 24-well plate and incubated at 37°C for 24 h, after which the biofilms were washed and stained with crystal violet. (B) Conidia ( $1 \times 10^4$ ) of each strain were inoculated at the center of an AMM agar plate and incubated at 37°C for 4 days.

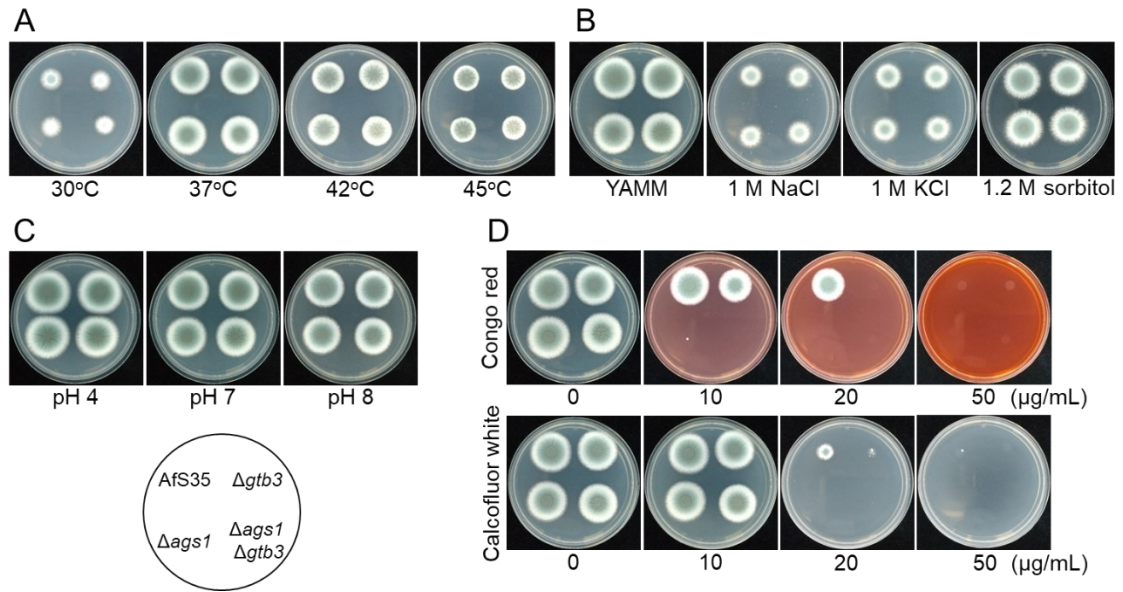

**Figure S5. Growth of the AfS35,  $\Delta$ ags1,  $\Delta$ gtb3, and  $\Delta$ ags1 $\Delta$ gtb3 strains on plates under stress conditions.** Conidia ((A–C)  $1.0 \times 10^4$ ; (D, E),  $1.0 \times 10^5$ ) were inoculated onto YAMM plates as indicated at the bottom left. and grown for 48 h. Plates were incubated (A) at the indicated temperatures; (B) in the presence of 1 M NaCl, 1 M KCl, or 1.2 M sorbitol in the medium at 37°C; (C) at the indicated pH at 37°C; (D) in the presence of congo red at 37°C; or (E) in the presence of calcofluor white at 37°C.

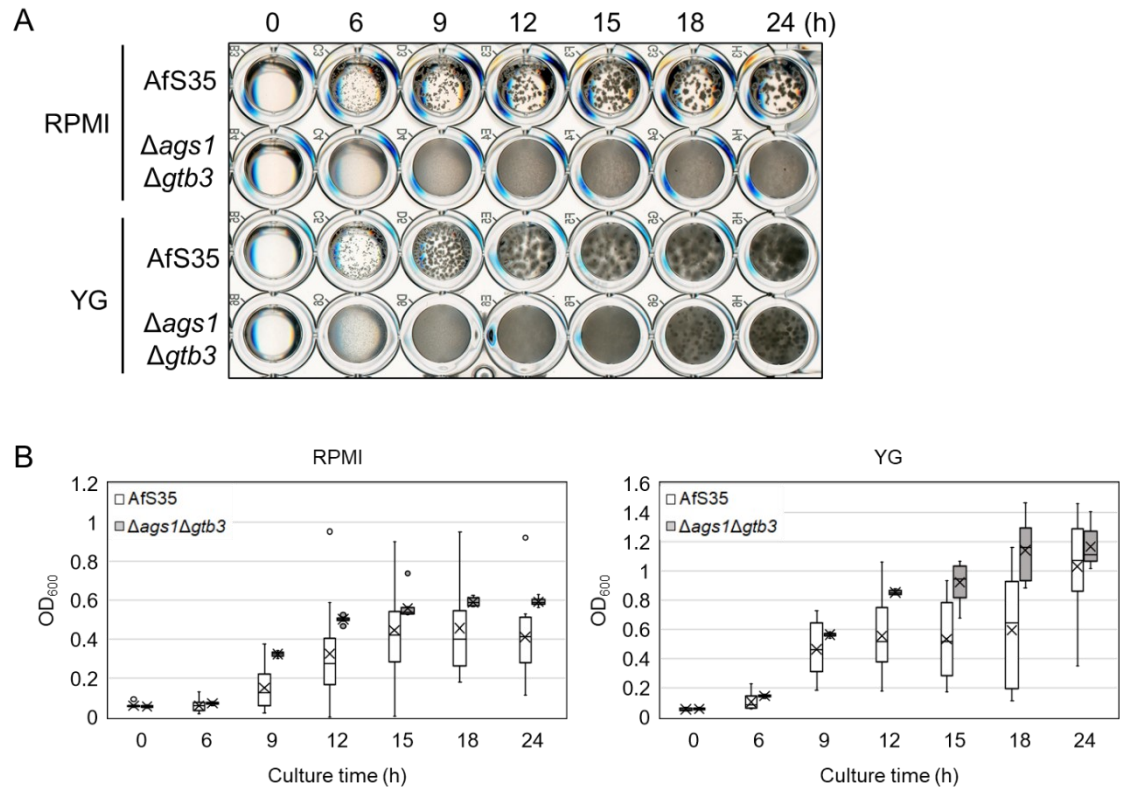

**Figure S6. Turbidity of the  $\Delta ags1\Delta gtb3$  strains cultured in YG and RPMI medium.**

(A) Image of a culture plate with strains. (B) Time course of OD<sub>600</sub>. The values of OD<sub>600</sub> values were calculated from 12 measurements per time point and are shown as by box plots. Lines in boxes indicate medians, and crosses indicate averages. Circles indicate outliers.

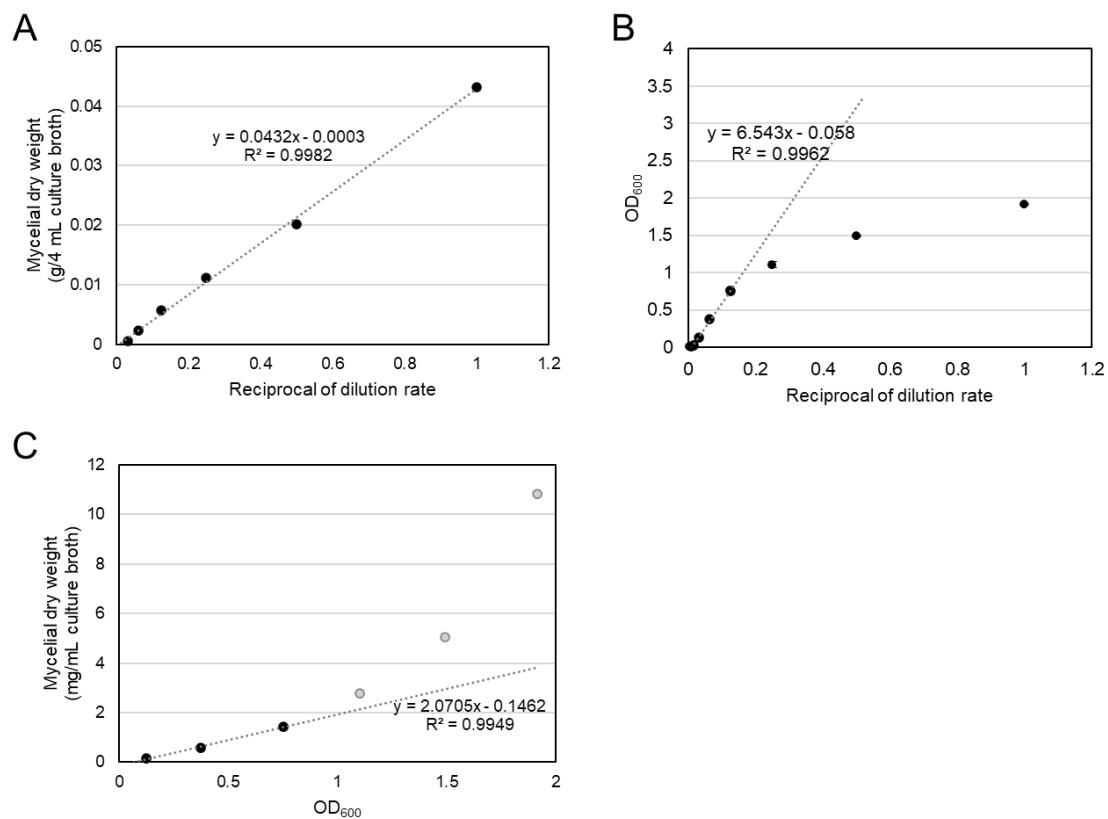

**Figure S7. Linear regression analysis.** Conidia ( $1.0 \times 10^7$ /mL) of the  $\Delta ags1\Delta gtb3$  strain were inoculated into AMM liquid medium and rotated at 160 rpm at 37°C for 18 h. The grown mycelia were filtered, and a dilution series of mycelial suspension was prepared. (A) Reciprocal of dilution rate versus mycelial dry weight. (B) Reciprocal of dilution rate versus  $OD_{600}$ . (C)  $OD_{600}$  versus mycelial dry weight.

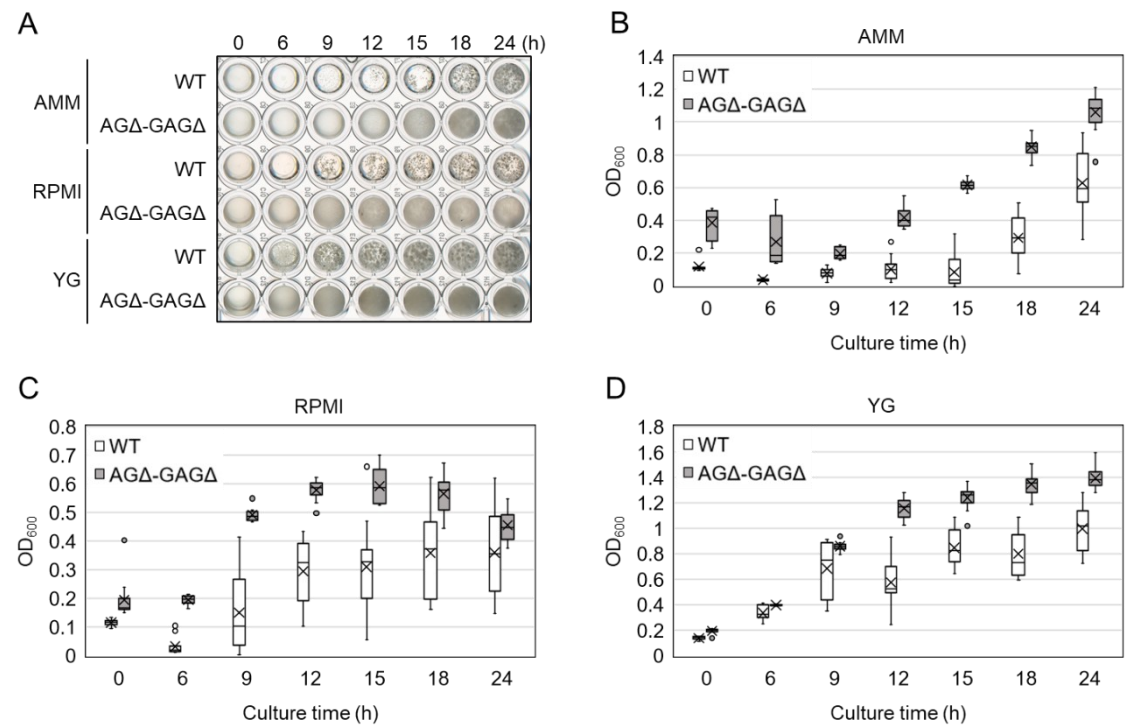

**Figure S8. Optical density of the *Aspergillus oryzae* wild-type and AGΔ-GAGΔ strains.** (A) Image of a culture plate with strains. Time course of OD<sub>600</sub> in fungal cultures in (B) AMM, (C) RPMI, or (D) YG medium. The OD<sub>600</sub> values were calculated from 12 measurements per time point and are shown as box plots. Lines in boxes indicate medians, and crosses indicate averages. Circles indicate outliers.

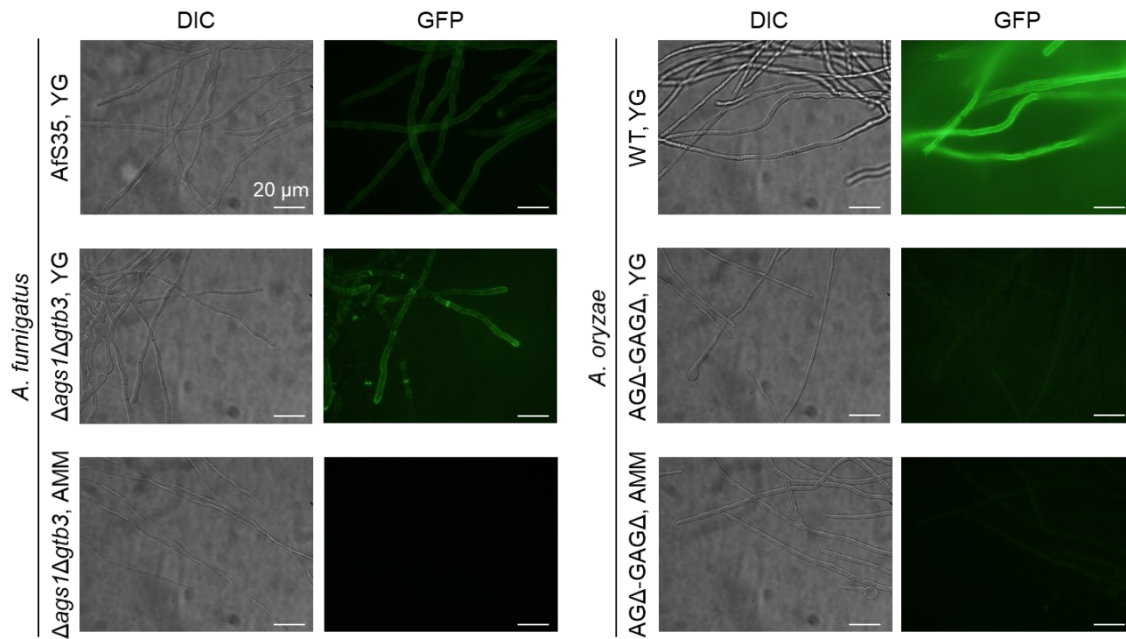

**Figure S9. Labeling of hyphal cells with the  $\alpha$ -1,3-glucan-binding domain of  $\alpha$ -1,3-glucanase fused with GFP (AGBD–GFP).** Hyphal cells were cultured in the indicated media for 24 h at 37°C (*A. fumigatus*) or 35°C (*A. oryzae*), fixed, and stained with AGBD–GFP to label  $\alpha$ -1,3-glucan. DIC, differential interference contrast.
